# Supplementary material
Source: ML conference proceedings conference paper supplement (https://proceedings.neurips.cc/paper_files/paper/2023/hash/1967f962c7c2083618236d80eeb9d1ac-Abstract.html)
Supplement: Supplementary file 1 [file 1967f962c7c2083618236d80eeb9d1ac-Supplemental-Conference.pdf]

---

# Adversarial Resilience in Sequential Prediction via Abstention

---

Anonymous Author(s)

Affiliation

Address

email

## Abstract

1 We study the problem of sequential prediction in the stochastic setting with an  
2 adversary that is allowed to inject clean-label adversarial (or out-of-distribution)  
3 examples. Algorithms designed to handle purely stochastic data tend to fail in the  
4 presence of such adversarial examples, often leading to erroneous predictions. This  
5 is undesirable in many high-stakes applications such as medical recommendations,  
6 where abstaining from predictions on adversarial examples is preferable to mis-  
7 classification. On the other hand, assuming fully adversarial data leads to very  
8 pessimistic bounds that are often vacuous in practice.

9 To capture this motivation, we propose a new model of sequential prediction that  
10 sits between the purely stochastic and fully adversarial settings by allowing the  
11 learner to abstain from making a prediction at no cost on adversarial examples.  
12 Assuming access to the marginal distribution on the non-adversarial examples, we  
13 design a learner whose error scales with the VC dimension (mirroring the stochastic  
14 setting) of the hypothesis class, as opposed to the Littlestone dimension which  
15 characterizes the fully adversarial setting. Furthermore, we design a learner for VC  
16 dimension 1 classes, which works even in the absence of access to the marginal  
17 distribution. Our key technical contribution is a novel measure for quantifying  
18 uncertainty for learning VC classes, which may be of independent interest.

## 19 1 Introduction

20 Consider the problem of sequential prediction in the realizable setting, where labels are generated  
21 from an unknown  $f^*$  belonging to a hypothesis class  $\mathcal{F}$ . Sequential prediction is typically studied  
22 under two distributional assumptions on the input data: the stochastic setting where the data is  
23 assumed to be identically and independently distributed (i.i.d) according to some fixed (perhaps  
24 unknown) distribution, and the fully-adversarial setting where we make absolutely no assumptions  
25 on the data generation process. A simple empirical risk minimization (ERM) strategy works for the  
26 stochastic setting where the learner predicts according to the best hypothesis on the data seen so  
27 far. The number of mistakes of this strategy typically scales with the Vapnik-Chervonenkis (VC)  
28 dimension of the underlying hypothesis class  $\mathcal{F}$ . However, in the fully adversarial setting, this strategy  
29 can lead to infinite mistakes even for classes of VC dimension 1 even if the adversary is required to  
30 be consistent with labels from  $f^*$ . The Littlestone dimension, which characterizes the complexity of  
31 sequential prediction in fully-adversarial setting, can be very large and often unbounded compared to  
32 the VC dimension [Lit87]. This mismatch has led to the exploration of beyond worst-case analysis  
33 for sequential prediction [RST11, HRS20, RS13a, BCKP20].

34 In this work, we propose a new framework that sits in between the stochastic and fully-adversarial  
35 setting. In particular, we consider sequential prediction with an adversary that injects adversarial  
36 (or out-of-distribution) examples in a stream of i.i.d. examples, and a learner that is allowed to

abstain from predicting on adversarial examples. A natural motivation for our framework arises in medical diagnosis where the goal is to predict a patient’s illness based on symptoms. In cases where the symptoms are not among the commonly indicative ones for the specific disease, or the symptoms may suggest a disease that is outside the scope of the doctor’s knowledge, it is safer for the doctor to abstain from making a prediction rather than risk making an incorrect one. Similarly, for self-driving cars, in cases where the car encounters weather conditions outside of its training, or unknown information signs, it is better for the algorithm to hand over access to the driver instead of making a wrong decision which could end up being fatal.

In the proposed framework, the learner’s goal is to minimize erroneous predictions on examples that the learner chooses to predict on (i.i.d. or adversarial) while refraining from abstaining on too many i.i.d. examples. If the learner was required to predict on every example, then the adversary could produce a fully-adversarial sequence of examples which would force the learner to make many erroneous predictions. The abstention option allows us to circumvent this challenge and handle any number of adversarial injections without incurring error proportional to the number of injections. Now we can ask the natural question:

*Is there a statistical price for certainty in sequential prediction?*

In particular, can we recover stochastic-like guarantees in the presence of an adversary if we are allowed to abstain from predicting on adversarial examples? A priori, it is not clear where on the spectrum between the fully-adversarial and stochastic models, the complexity of this problem lies. The main challenges arise from the fact that adversary fully controls the injection levels and provides no feedback about which examples were adversarial, and the learner has to perform one-sample outlier detection algorithm, which is nearly impossible. Despite this, we show that it is possible to guarantee certainty in a statistically efficient manner.

## 1.1 Main Contributions

We summarize the main contributions of our work:

- We formalize a new model of beyond-worst case learning which captures online learning on stochastic input with a clean-label attack adversary. With the option of abstention, our model allows for any number of injections by the adversary without incurring error proportional to the number of injections. Our notion of error simultaneously guarantees few mistakes on classified data while ensuring low abstention rate on non-adversarial data. Our model also naturally connects to uncertainty quantification and testable learning.
- We propose an algorithm that achieves error  $O(d^2 \log T)$  for classes with VC dimension  $d$  for time horizon  $T$ , given access to the marginal distribution over the i.i.d. examples. This allows us to get (up to a factor of  $d$ ) the guarantees of the stochastic setting while allowing for adversarial injections.
- We further propose an algorithm that achieves  $O(\sqrt{T})$  error for the special (but important) case of VC dimension 1 classes without any access to the marginal distribution over the i.i.d. examples.

Our algorithms uses a novel measure of uncertainty for VC classes to identify regions of high uncertainty (where the learner abstains) or high information gain (where the learner predicts and learn from their mistakes). The measure uses structural properties of VC classes, in particular, shattered sets of varying sizes. In the known distribution setting, our measure is easy to compute, however for the unknown distribution setting, we show how to design a proxy using only the examples we have seen so far using a leave-one-out type strategy.

## 1.2 Related Work

**Beyond-worst case sequential prediction.** Due to pessimistic nature of bounds in adversarial online learning, there are several frameworks designed to address this issue. One approach is consider mild restrictions on the adversarial instances such as slight perturbation by noise. This has been formalized as the smoothed adversary model (see [RST11, HRS20, HRS22, HHSY22, BDGR22]) and has been used to get statistical and computationally efficient algorithms. Another approach has been to make the future sequences more predictable given the past instances. Examples of such settings are predictable sequence [RS13b], online learning with hints [BCKP20], and notions of adaptive regret bounds [FRS20].

**Abstention-based learning.** Abstention has been considered in several other works in classification, both in the online and offline settings. An early example of this is the Chow reject model [Cho70]. Various versions of this have been considered in offline learning (see e.g. [HW06, BW08, BZ20] and references therein) and online learning (see e.g. [ZC16, CDG<sup>+</sup>19, NZ20] and references therein). These results show that abstention can lead to algorithms with desired features, for example fast rates without margins assumptions. Another line of work that is closely related to our setting is the KWIK (*knows what it knows*) framework by [LLW08] which requires the learner to make predictions only when it is absolutely confident, and abstain otherwise. This requirement was relaxed to allow for mistakes in [SZB10]. The key difference from our work is that it assumes a fully-adversarial stream thus, the error bounds can be as large as the domain size. Perhaps, the work that is closest to our setting is the study of adversarial learning with clean-label injections by [GKKM20, KK21]. In their *transductive* adversarial model, the learner is given labeled training examples and unlabeled test examples on which it must predict, where the test examples may have been injected by an adversary. They show how to abstain with few test misclassifications and few false abstentions on non-adversarial examples. However, in many real-world scenarios, it is unrealistic to expect to have the entire test set in advance, which further motivates the fully online setting that we consider.

**Adversarially robust learning.** Highly related to our setting is the problem of *inductive* learning in the presence of adversarial corruptions. The literature on this is generally divided into two scenarios: test-time attacks and training-time attacks. In the case of test-time attacks, the learning algorithm is trained on an (uncorrupted) i.i.d. training set, but its *test* examples may be corrupted by an adversary whose intention is to change the classification by corrupting the test example [SZS<sup>+</sup>13, BCM<sup>+</sup>13, GSS15, FMS18, AKM19, MHS19, MHS20, MHS21, MHS22, MGDS20]. On the other hand, in the case of training-time attacks, the training data the learning algorithm trains on is corrupted by an adversary (subject to some constraints on what fraction it may corrupt and what types of corruptions are possible), while the test examples are uncorrupted [Val85, KL93, BEK02, BNL12, ABL17, SKL17, SHN<sup>+</sup>18, LF21, GKM21, HKM<sup>+</sup>22, BBHS22]. In particular, within this literature, most relevant to the present work is the work on *clean-label* poisoning, where the adversary’s corrupted examples are still labeled correctly by the target concept [SHN<sup>+</sup>18, BHQS21]. Comparing to the present work, it is interesting to note that the fact that our setting involves *sequential* prediction (i.e., online), our problem may be viewed simultaneously as *both* training-time and test-time corruption: that is, because on each round the point we are predicting (or abstaining) on may be inserted by an adversary, this could be viewed as a test-time attack; on the other hand, since the prefix of labeled examples we use to make this prediction may also contain adversarial examples, this can also be viewed as a training-time attack. Thus, our setting requires reasoning accounting for issues arising from both attack scenarios, representing a natural blending of the two types of scenarios.

**Adversarial Examples.** Our clean-label attack is very closely related and motivated by the setting of adversarial examples [SZS<sup>+</sup>13, BCM<sup>+</sup>13, GSS14]. The goal in this setting is to learn a classifier that predicts correctly on all adversarial examples, which is a very strong requirement. Empirical work in this space has focused on designing methods to make training adversarially robust [MMS<sup>+</sup>17, WK18], and also on detecting adversarial examples [PDDZ18, AHFD22]. Detecting adversarial examples is a very challenging task and proposed solutions are often brittle [CW17]. In fact, our framework does not explicitly require detection as long as we can predict correctly on these.

## 2 Abstention Framework

In this section, we present the formal framework for sequential prediction with abstentions.

**Notation.** We will denote the domain with  $\mathcal{X}$  and the distribution over  $\mathcal{X}$  as  $\mathcal{D}$ . We let  $\Delta(\mathcal{X})$  denote the set of all distributions over  $\mathcal{X}$ . We will work in the realizable setting where our label will be according to some function in  $\mathcal{F}$  with VC dimension  $d$ . Given a class  $\mathcal{F}$  and a data set  $S = \{(x_i, y_i)\}$ , we will denote by  $\mathcal{F}|_S$ , the class  $\mathcal{F}|_S = \{f \in \mathcal{F} : \forall i \quad f(x_i) = y_i\}$ . When the data set contains a single point  $S = \{(x, y)\}$ , it will be convenient to denote  $\mathcal{F}|_S$  as  $\mathcal{F}^{x \rightarrow y}$ .

**Protocol.** At the start, the adversary (or nature) picks a distribution  $\mathcal{D}$  over the domain  $\mathcal{X}$  and the labelling function  $f^* \in \mathcal{F}$ . We will be interested in both the setting where the learner knows the distribution  $\mathcal{D}$  and the setting where the learner does not know the distribution  $\mathcal{D}$ . In the traditional sequential prediction framework, the learner sees input  $x_t$  at time  $t$  and makes a prediction  $\hat{y}_t$  and observes the true label  $y_t$ . The main departure of our setting from this is that an adversary also



Indeed, it is known that the function classes  $\mathcal{F}$  for which non-abstaining predictors can be forced to have  $\text{MisclassificationError} = \Omega(T)$  are precisely those with embedded threshold problems of unbounded size [Lit87, She78, Hod97, ALMM19]. Let us now consider the learner that abstains in the disagreement region and predicts based on the consistent hypothesis outside of this region.

**Proposition 3.1.** *Disagreement-based learner for one dimensional thresholds has  $\text{MisclassificationError} = 0$  and  $\text{AbstentionError} \leq 2 \log(T)$ .*

To see this note that our learner only predicts when the input is not in the disagreement region and thus it never predicts incorrectly ( $\text{MisclassificationError} = 0$ ). As for the abstentions, a simple exchangeability argument shows that when there are  $n$  i.i.d. examples in the sequence, the probability of the new non-adversarial example being in the disagreement region is  $1/n$ . Summing this over the time horizon gives us the above proposition.

**Perfect Selective Classification and Active Learning.** The learner for the above thresholds problem is a well-known strategy from the areas of perfect selective classification and active learning known as *disagreement-based learning* [RS88, EYW10, CAL94, BBL09, DHM07, HY15]. In the perfect selective classification setting [RS88, EYW10], the learner observes the examples sequentially, as in our framework, and may predict or abstain on each, and must satisfy the requirement that whenever it predicts its prediction is *always* correct. From this fact, it immediately follows that applying any perfect selective classification strategy in our setting, we always have  $\text{MisclassificationError} = 0$ , so that its performance is judged purely on its abstention rate on the iid examples. It was argued by [EYW10] that the optimal abstention rate among perfect selective classification strategies is obtained by the strategy that makes a prediction on the next example if and only if all classifiers in the hypothesis class that are correct on all examples observed so far, *agree* on the example. Note that this is precisely the same learner used above. This same strategy has also been studied in the related setting of *stream-based active learning*<sup>1</sup> [CAL94, BBL09, Han09, Han14, DHM07, HY21]. The abstention rate achievable by this strategy for general hypothesis classes is thoroughly understood [Han07, Han11, Han09, Han12, Han14, Han16, EYW10, EYW12, WHE15, HY15]. In particular, a complete characterization of the optimal distribution-free abstention rate of perfect selective classification is given by the *star number* of the hypothesis class [HY15, Han16]. The star number  $\mathfrak{s}$  is the size of the largest number  $s$  such that there are examples  $\{x_1, \dots, x_s\}$  and hypotheses  $h_0, h_1, \dots, h_s$  such that  $h_i$  and  $h_0$  disagree exactly on  $x_i$ . For instance,  $\mathfrak{s} = 2$  for threshold classifiers [HY15]. It was shown by [Han16] that the optimal distribution-free abstention rate for perfect selective classification is sublinear if and only if the star number is finite (in which case it is always at most  $\mathfrak{s} \log(T)$ ). One can show that  $\mathfrak{s}$  is always lower bounded by the VC dimension of the class. Unfortunately, the star number is infinite for most hypothesis classes of interest, even including simple VC classes such as *interval* classifiers [HY15].

**Beyond disagreement-based learning.** The learner that abstains whenever it sees an example that it is not certain of may be too conservative. Furthermore, it does not exploit the possibility of learning from mistakes. Let us consider another example to elucidate this failure. Consider the class of  $d$  intervals in one dimension where the positive examples form a union of intervals. This class has VC dimension  $d$  but infinite star number. Suppose that  $d = 2$  but examples in the second interval are very rarely selected by i.i.d. examples. Then the disagreement-based learner would suggest to abstain on all examples to protect against the possibility that our new example is in the second interval. However, consider the following simple strategy: if the new example lies between two positives (resp. negatives), we predict positive (resp. negative), else we abstain.

**Proposition 3.2.** *The proposed strategy for the class of  $d$ -intervals in one dimension has  $\text{MisclassificationError} \leq d$  and  $\text{AbstentionError} \leq 2d \log(T)$ .*

To see this, note that whenever we predict, either we are correct or we have identified the location of a new interval, hence reducing the VC dimension of the class by 1. Since there are at most  $d$  intervals, we will therefore make at most  $d$  errors when we predict, implying  $\text{MisclassificationError} \leq d$ . As for abstaining on i.i.d. examples, the same argument for thresholds can be applied here by treating the intervals as at most  $d$  thresholds.

<sup>1</sup>In this setting, instead of observing a sequence of labelled examples, the learner only observes the examples without their target labels, and at each time may query to observe the target label. The disagreement-based strategy chooses to query precisely on the points for which the classifiers in the hypothesis class correct on the observed labels so far do not all agree on the label [CAL94]. The rate of querying for this strategy is precisely the same as the abstention rate in the perfect selection classification setting [Han11, Han14, EYW12].







which we denote by  $\gamma_t = \gamma(S_t, \mathcal{F})$ . The main idea for the proof is to note that when we decide to predict the label with the larger value of  $\Gamma$  is bigger by an additive  $\alpha$ . Thus, when a mistake occurs the value of  $\gamma$  decreases by at least  $\alpha$ . Summing the errors over all time steps gives the following bound.

**Lemma 5.2.** *Algorithm 2 has  $\mathbb{E}[\text{MisclassificationError}] \leq 2T/\alpha$ .*

Next, we move on to the analysis of the number of abstentions. In fact, we will prove a stronger structural results that shows that the number of examples such that there is any set of adversarial injections that would make the algorithm abstain is small. We refer to examples on which algorithm can be made to abstain as attackable examples (formally defined in Definition B.2). The main idea is to prove that in any set of iid examples, there are only a few attackable ones. This is formally stated and proved as Lemma B.3. Using this claim, we can bound the number of abstentions using an exchangeability argument.

**Lemma 5.3.** *Algorithm 2 has  $\mathbb{E}[\text{AbstentionError}] \leq \alpha \log T$ .*

The proof of Theorem 5.1 follows from Lemma 5.2 and Lemma 5.3 by setting  $\alpha = \sqrt{T/\log T}$ .

## 6 Discussion and Future Directions

In this paper, we introduce a framework for beyond-worst case adversarial sequential predictions by using abstention. Our proposed framework falls at the intersection of several learning paradigms such as active learning, uncertainty quantification, and distribution testing. In this framework we show two main positive results, validating the beyond-worse case nature of our framework. However, our work has only scratched the surface of understanding learnability for VC classes in this new framework. Here we discuss several exciting future directions:

- Our techniques rely strongly on the realizability, however our framework can naturally be extended to settings with label noise. Immediate questions here would be to extend our results to simple noise models such as random classification noise and Massart noise or more ambitiously the agnostic noise model.
- Our framework can naturally be extended to more general forms of prediction such as multiclass classification, partial concept classes, and regression. It would be interesting to characterize learnability in these settings.
- In the known distribution case, it remains to find the optimal error bound. We conjecture that the correct dependence on VC dimension  $d$  should be linear.
- In the unknown distribution case, extending our result for VC dimension  $d > 1$  classes is wide open. Though, we have algorithms for certain classes of higher VC dimension, such as intervals and axis-aligned rectangles, they seem to heavily exploit the structure of the particular class. Thus, showing either an upper or lower bounds of the error dependence on both the class and the time horizon would be interesting.
- The unknown distribution case can be seen as form of distribution-free uncertainty quantification. It would be interesting to understand connections to other forms such as conformal prediction. On a technical level, our work exploits exchangeability of the i.i.d. sequence which is the foundation of conformal prediction, though the main challenge in our setting is the presence of adversarial inputs. It would be interesting to build on this connections and understand whether techniques can be ported over in either direction.
- Our focus for this paper has been entirely on the statistical benefits of abstention. Understanding the computational complexity in this setting is an exciting avenue for research. Concretely, for halfspaces in  $d$  dimensions, is there a polynomial time algorithm for learning with abstentions, even for well-behaved distributions such as Gaussians. On a related note, showing computational-statistical gaps in this specialized setting would be interesting, albeit disappointing.

**Broader Impact.** The aim of our work is design a theoretical framework for handling adversarial examples and guaranteeing certainty in sequential prediction. Our model assumes no cost for abstaining on adversarial inputs. However, in real-world scenarios, these costs can be high, consider the human cost of evaluating each of the abstained examples. Furthermore, as with any framework, application of our metric without taking into account the nuances of the real-world situation could lead to unintended consequences, for example, a high abstention rate on marginalized sub-populations.

## References

- [ABL17] Pranjal Awasthi, Maria Florina Balcan, and Philip M Long. The power of localization for efficiently learning linear separators with noise. *Journal of the ACM (JACM)*, 63(6):1–27, 2017.
- [AHFD22] Ahmed Aldahdooh, Wassim Hamidouche, Sid Ahmed Fezza, and Olivier Déforges. Adversarial example detection for dnn models: A review and experimental comparison. *Artificial Intelligence Review*, 55(6):4403–4462, 2022.
- [AKM19] Idan Attias, Aryeh Kontorovich, and Yishay Mansour. Improved generalization bounds for robust learning. In *Proceedings of the 30<sup>th</sup> International Conference on Algorithmic Learning Theory*, 2019.
- [ALMM19] Noga Alon, Roi Livni, Maryanthe Malliaris, and Shay Moran. Private PAC learning implies finite littlestone dimension. In *Proceedings of the 51st Annual ACM Symposium on Theory of Computing (STOC)*, page 852–860, 2019.
- [BBHS22] M.-F. Balcan, A. Blum, S. Hanneke, and D. Sharma. Robustly-reliable learners under poisoning attacks. In *Proceedings of the 35<sup>th</sup> Annual Conference on Learning Theory*, 2022.
- [BBL09] M.-F. Balcan, A. Beygelzimer, and J. Langford. Agnostic active learning. *Journal of Computer and System Sciences*, 75(1):78–89, 2009.
- [BCKP20] Aditya Bhaskara, Ashok Cutkosky, Ravi Kumar, and Manish Purohit. Online learning with imperfect hints. In *Proceedings of the International Conference on Machine Learning (ICML)*, pages 822–831. PMLR, 2020.
- [BCM<sup>+</sup>13] Battista Biggio, Igino Corona, Davide Maiorca, Blaine Nelson, Nedim Šrndić, Pavel Laskov, Giorgio Giacinto, and Fabio Roli. Evasion attacks against machine learning at test time. In *Joint European conference on machine learning and knowledge discovery in databases*, pages 387–402. Springer, 2013.
- [BD15] Shai Ben-David. 2 notes on classes with vapnik-chervonenkis dimension 1, 2015.
- [BDGR22] Adam Block, Yuval Dagan, Noah Golowich, and Alexander Rakhlin. Smoothed online learning is as easy as statistical learning. In *Proceedings of the Conference on Learning Theory (COLT)*, pages 1716–1786. PMLR, 2022.
- [BEK02] Nader H Bshouty, Nadav Eiron, and Eyal Kushilevitz. PAC learning with nasty noise. *Theoretical Computer Science*, 288(2):255–275, 2002.
- [BHQ21] Avrim Blum, Steve Hanneke, Jian Qian, and Han Shao. Robust learning under clean-label attack. In *Conference on Learning Theory (COLT)*, 2021.
- [BNL12] Battista Biggio, B Nelson, and P Laskov. Poisoning attacks against support vector machines. In *29th International Conference on Machine Learning*, pages 1807–1814. ArXiv e-prints, 2012.
- [BW08] Peter L. Bartlett and Marten H. Wegkamp. Classification with a reject option using a hinge loss. *Journal of Machine Learning Research*, 9(59):1823–1840, 2008.
- [BZ20] Olivier Bousquet and Nikita Zhivotovskiy. Fast classification rates without standard margin assumptions, 2020.
- [CAL94] David Cohn, Les Atlas, and Richard Ladner. Improving generalization with active learning. *Machine Learning*, 15:201–221, 1994.
- [CDG<sup>+</sup>19] Corinna Cortes, Giulia DeSalvo, Claudio Gentile, Mehryar Mohri, and Scott Yang. Online learning with abstention, 2019.
- [Cho70] C. Chow. On optimum recognition error and reject tradeoff. *IEEE Transactions on Information Theory*, 16(1):41–46, 1970.

443 [CW17] Nicholas Carlini and David Wagner. Adversarial examples are not easily detected:  
 444 Bypassing ten detection methods. In *Proceedings of the 10th ACM Workshop on*  
 445 *Artificial Intelligence and Security*, pages 3–14. ACM, 2017.

446 [DHM07] S. Dasgupta, D. Hsu, and C. Monteleoni. A general agnostic active learning algorithm.  
 447 In *Advances in Neural Information Processing Systems* 20, 2007.

448 [EYW10] Ran El-Yaniv and Yair Wiener. On the foundations of noise-free selective classification.  
 449 *Journal of Machine Learning Research*, 11(5), 2010.

450 [EYW12] R. El-Yaniv and Y. Wiener. Active learning via perfect selective classification. *Journal*  
 451 *of Machine Learning Research*, 13(2):255–279, 2012.

452 [FMS18] Uriel Feige, Yishay Mansour, and Robert E. Schapire. Robust inference for multiclass  
 453 classification. In Firdaus Janoos, Mehryar Mohri, and Karthik Sridharan, editors,  
 454 *Algorithmic Learning Theory, ALT 2018, 7-9 April 2018, Lanzarote, Canary Islands,*  
 455 *Spain*, volume 83 of *Proceedings of Machine Learning Research*, pages 368–386. PMLR,  
 456 2018.

457 [FRS20] Dylan J. Foster, Alexander Rakhlin, and Karthik Sridharan. Adaptive online learning,  
 458 2020.

459 [GKKM20] Shafi Goldwasser, Adam Tauman Kalai, Yael Tauman Kalai, and Omar Montasser.  
 460 Selective classification algorithms provably robust to arbitrary adversarial examples. In  
 461 *Advances in Neural Information Processing Systems*, 2020.

462 [GKM21] Ji Gao, Amin Karbasi, and Mohammad Mahmoody. Learning and certification under  
 463 instance-targeted poisoning. *The Conference on Uncertainty in Artificial Intelligence*  
 464 *(UAI)*, 2021.

465 [GSS14] Ian J Goodfellow, Jonathon Shlens, and Christian Szegedy. Explaining and harnessing  
 466 adversarial examples. *arXiv preprint arXiv:1412.6572*, 2014.

467 [GSS15] Ian J. Goodfellow, Jonathon Shlens, and Christian Szegedy. Explaining and harnessing  
 468 adversarial examples. In *Proceedings of the 3rd International Conference on Learning*  
 469 *Representations, ICLR*, 2015.

470 [Han07] S. Hanneke. A bound on the label complexity of agnostic active learning. In *Proceedings*  
 471 *of the 24<sup>th</sup> International Conference on Machine Learning*, 2007.

472 [Han09] S. Hanneke. *Theoretical Foundations of Active Learning*. PhD thesis, Machine Learning  
 473 Department, School of Computer Science, Carnegie Mellon University, 2009.

474 [Han11] S. Hanneke. Rates of convergence in active learning. *The Annals of Statistics*, 39(1):333–  
 475 361, 2011.

476 [Han12] S. Hanneke. Activized learning: Transforming passive to active with improved label  
 477 complexity. *Journal of Machine Learning Research*, 13(5):1469–1587, 2012.

478 [Han14] S. Hanneke. Theory of disagreement-based active learning. *Foundations and Trends in*  
 479 *Machine Learning*, 7(2–3):131–309, 2014.

480 [Han16] S. Hanneke. Refined error bounds for several learning algorithms. *Journal of Machine*  
 481 *Learning Research*, 17(135):1–55, 2016.

482 [HHSY22] Nika Haghtalab, Yanjun Han, Abhishek Shetty, and Kunhe Yang. Oracle-efficient  
 483 online learning for beyond worst-case adversaries. In *Advances in Neural Information*  
 484 *Processing Systems (NeurIPS)*, 2022. to appear.

485 [HKM<sup>+</sup>22] S. Hanneke, A. Karbasi, M. Mahmoody, I. Mehal, and S. Moran. On optimal learning  
 486 under targeted data poisoning. In *Advances in Neural Information Processing Systems*  
 487 36, 2022.

488 [Hod97] Wilfrid Hodges. *A Shorter Model Theory*. Cambridge University Press, 1997.

489 [HRS20] Nika Haghtalab, Tim Roughgarden, and Abhishek Shetty. Smoothed analysis of online  
490 and differentially private learning. *Advances in Neural Information Processing Systems*,  
491 33:9203–9215, 2020.

492 [HRS22] Nika Haghtalab, Tim Roughgarden, and Abhishek Shetty. Smoothed analysis with  
493 adaptive adversaries. In *Proceedings of the Annual Symposium on Foundations of*  
494 *Computer Science (FOCS)*, pages 942–953, 2022.

495 [HW06] Radu Herbei and Marten H. Wegkamp. Classification with reject option. *The Canadian*  
496 *Journal of Statistics / La Revue Canadienne de Statistique*, 34(4):709–721, 2006.

497 [HY15] Steve Hanneke and Liu Yang. Minimax analysis of active learning. *Journal of Machine*  
498 *Learning Research*, 16(109):3487–3602, 2015.

499 [HY21] S. Hanneke and L. Yang. Toward a general theory of online selective sampling: Trading  
500 off mistakes and queries. In *Proceedings of the 24<sup>th</sup> International Conference on*  
501 *Artificial Intelligence and Statistics*, 2021.

502 [KK21] Adam Tauman Kalai and Varun Kanade. Towards optimally abstaining from prediction  
503 with ood test examples, 2021.

504 [KL93] Michael Kearns and Ming Li. Learning in the presence of malicious errors. *SIAM*  
505 *Journal on Computing*, 22(4):807–837, 1993.

506 [LF21] Alexander Levine and Soheil Feizi. Deep partition aggregation: Provable defense against  
507 general poisoning attacks. *International Conference on Learning Representations*  
508 *(ICLR)*, 2021.

509 [Lit87] Nick Littlestone. Learning quickly when irrelevant attributes abound: A new linear-  
510 threshold algorithm. In *28th Annual Symposium on Foundations of Computer Science*  
511 *(sfcs 1987)*, pages 68–77, 1987.

512 [LLW08] Lihong Li, Michael L Littman, and Thomas J Walsh. Knows what it knows: a framework  
513 for self-aware learning. In *Proceedings of the 25th international conference on Machine*  
514 *learning*, pages 568–575, 2008.

515 [MGDS20] Omar Montasser, Surbhi Goel, Ilias Diakonikolas, and Nathan Srebro. Efficiently learn-  
516 ing adversarially robust halfspaces with noise. In *Proceedings of the 37th International*  
517 *Conference on Machine Learning, ICML 2020, 13-18 July 2020, Virtual Event*, volume  
518 119 of *Proceedings of Machine Learning Research*, pages 7010–7021. PMLR, 2020.

519 [MHS19] Omar Montasser, Steve Hanneke, and Nathan Srebro. Vc classes are adversarially  
520 robustly learnable, but only improperly. In Alina Beygelzimer and Daniel Hsu, editors,  
521 *Proceedings of the Thirty-Second Conference on Learning Theory*, volume 99 of *Pro-*  
522 *ceedings of Machine Learning Research*, pages 2512–2530, Phoenix, USA, 25–28 Jun  
523 2019. PMLR.

524 [MHS20] Omar Montasser, Steve Hanneke, and Nati Srebro. Reducing adversarially robust learn-  
525 ing to non-robust PAC learning. In Hugo Larochelle, Marc’Aurelio Ranzato, Raia  
526 Hadsell, Maria-Florina Balcan, and Hsuan-Tien Lin, editors, *Advances in Neural Infor-*  
527 *mation Processing Systems 33: Annual Conference on Neural Information Processing*  
528 *Systems 2020, NeurIPS 2020, December 6-12, 2020, virtual*, 2020.

529 [MHS21] Omar Montasser, Steve Hanneke, and Nathan Srebro. Adversarially robust learning  
530 with unknown perturbation sets. *CoRR*, abs/2102.02145, 2021.

531 [MHS22] O. Montasser, S. Hanneke, and N. Srebro. Adversarially robust learning: A generic  
532 minimax optimal learner and characterization. In *Advances in Neural Information*  
533 *Processing Systems 36*, 2022.

534 [MMS<sup>+</sup>17] Aleksander Madry, Aleksandar Makelov, Ludwig Schmidt, Dimitris Tsipras, and Adrian  
535 Vladu. Towards deep learning models resistant to adversarial attacks. *arXiv preprint*  
536 *arXiv:1706.06083*, 2017.

537 [NZ20] Gergely Neu and Nikita Zhivotovskiy. Fast rates for online prediction with abstention,  
538 2020.

539 [PDDZ18] Tianyu Pang, Chao Du, Yinpeng Dong, and Jun Zhu. Towards robust detection of  
540 adversarial examples. In *Advances in Neural Information Processing Systems*, pages  
541 4579–4589, 2018.

542 [RS88] Ronald L. Rivest and Robert H. Sloan. Learning complicated concepts reliably and  
543 usefully (extended abstract). In Tom Mitchell and Reid Smith, editors, *Proceedings*  
544 *AAAI-88*, pages 635–640. AAAI, 1988.

545 [RS13a] Alexander Rakhlin and Karthik Sridharan. Online learning with predictable sequences.  
546 In *Proceedings of the Conference on Learning Theory (COLT)*, pages 993–1019. PMLR,  
547 2013.

548 [RS13b] Sasha Rakhlin and Karthik Sridharan. Optimization, learning, and games with pre-  
549 dictable sequences. *Advances in Neural Information Processing Systems*, 26, 2013.

550 [RST11] Alexander Rakhlin, Karthik Sridharan, and Ambuj Tewari. Online learning: Stochastic  
551 and constrained adversaries. *arXiv preprint arXiv:1104.5070*, 2011.

552 [RV22] Ronitt Rubinfeld and Arsen Vasilyan. Testing distributional assumptions of learning  
553 algorithms. *arXiv preprint arXiv:2204.07196*, 2022.

554 [She78] Saharon Shelah. *Classification Theory and the Number of Non-isomorphic Models*.  
555 North Holland, 1978.

556 [SHN<sup>+</sup>18] Ali Shafahi, W Ronny Huang, Mahyar Najibi, Octavian Suciu, Christoph Studer, Tudor  
557 Dumitras, and Tom Goldstein. Poison frogs! targeted clean-label poisoning attacks  
558 on neural networks. In *Advances in Neural Information Processing Systems*, pages  
559 6103–6113, 2018.

560 [SKL17] Jacob Steinhardt, Pang Wei Koh, and Percy Liang. Certified defenses for data poisoning  
561 attacks. *Advances in Neural Information Processing Systems*, 30, 2017.

562 [SZB10] Amin Sayedi, Morteza Zadimoghaddam, and Avrim Blum. Trading off mistakes and  
563 don’t-know predictions. In *Advances in Neural Information Processing Systems*, pages  
564 2092–2100, 2010.

565 [SZS<sup>+</sup>13] Christian Szegedy, Wojciech Zaremba, Ilya Sutskever, Joan Bruna, Dumitru Erhan, Ian  
566 Goodfellow, and Rob Fergus. Intriguing properties of neural networks. *arXiv preprint*  
567 *arXiv:1312.6199*, 2013.

568 [Val85] Leslie G Valiant. Learning disjunctions of conjunctions. In *Proceedings of the 9th*  
569 *International Joint Conference on Artificial intelligence*, pages 560–566, 1985.

570 [WHE15] Y. Wiener, S. Hanneke, and R. El-Yaniv. A compression technique for analyzing  
571 disagreement-based active learning. *Journal of Machine Learning Research*, 16(4):713–  
572 745, 2015.

573 [WK18] Eric Wong and Zico Kolter. Provable defenses against adversarial examples via the  
574 convex outer adversarial polytope. In *International conference on machine learning*,  
575 pages 5286–5295. PMLR, 2018.

576 [ZC16] Chicheng Zhang and Kamalika Chaudhuri. The extended littlestone’s dimension for  
577 learning with mistakes and abstentions. In *Conference on Learning Theory*, pages  
578 1584–1616. PMLR, 2016.



Also, note once end of the phase corresponding to  $k$ ,  $e_k$ , is reached when  $\rho_k(\mathcal{F}_t) \leq \alpha_k$ . This leads to the required bound.  $\square$

### A.3 Proof of Lemma 4.3

*Proof.* Let  $t \in [\ell_k, m_k]$ . Recall that  $\mathcal{F}_t$  denotes the class consistent with the data seen till time  $t$ . Recall that  $H_t$  denotes the history of the interaction till time  $t$ .

$$\mathbb{E} \left[ \mathbb{1} [c_t = 0 \wedge \hat{y}_t(\hat{x}_t) = \perp] \mid H_t \right] = \mathbb{E} \left[ \mathbb{1} [c_t = 0 \wedge \hat{y}_t(x_t) = \perp] \mid H_t \right] \quad (5)$$

$$\leq \mathbb{E} \left[ \mathbb{1} [\hat{y}_t(x_t) = \perp] \mid H_t \right] \\ \leq \Pr \left[ \min \left\{ \rho_k(\mathcal{F}_t^{x_t \rightarrow 1}), \rho_k(\mathcal{F}_t^{x_t \rightarrow 0}) \right\} \geq 0.6 \rho_k(\mathcal{F}_t) \mid H_t \right] \quad (6)$$

$$\leq \Pr \left[ \rho_k(\mathcal{F}_t^{x_t \rightarrow 1}) + \rho_k(\mathcal{F}_t^{x_t \rightarrow 0}) \geq 1.2 \rho_k(\mathcal{F}_t) \mid H_t \right] \quad (7)$$

$$\leq 5 \frac{\rho_{k+1}(\mathcal{F}_t)}{\rho_k(\mathcal{F}_t)} \quad (8)$$

$$\leq 5 \frac{\alpha_{k+1}}{\alpha_k}. \quad (9)$$

The equality in (5) follows from the fact that in the uncorrupted rounds,  $\hat{x}_t = x_t$ . The inequality in (6) follows from the condition for abstention in Algorithm 1 and the fact that  $x_t \sim \mathcal{D}$ . (7) follows from the fact that the min of two numbers is at most their average. The key step is (8) which follows from Lemma 4.2. (9) follows from the fact that at level  $k$  in Algorithm 1,  $\rho_{k+1}(\mathcal{F}_t) \leq \alpha_k$  and  $\rho_k(\mathcal{F}_t) \geq \alpha_{k+1}$ . Summing this bound and noting that  $e_k - \ell_k$  is at most  $T$ , we get the required bound.  $\square$

### A.4 Proof of Theorem 4.1

*Proof.* First, let us look at the misclassification error. Note that Algorithm 1 will not misclassify when  $k = 1$ . To see this, recall from Definition 4.2 that  $\hat{x}_t \in \mathcal{S}_1$  implies that there is a unique label consistent with the history. For the remaining levels, we sum the errors from Lemma 4.4 and recall that  $\alpha_k = T^{-k}$ , which gives us

$$\begin{aligned} \text{MisclassificationError} &= \sum_{t=1}^T \mathbb{1}[\hat{y}_t = 1 - f^*(x_t)] \\ &\leq 2 \sum_{k=2}^d \log \left( \frac{1}{\alpha_k} \right) \\ &\leq 2 \sum_{k=2}^d k \log T \\ &\leq d^2 \log T. \end{aligned}$$

For the abstention error, we again begin with the case of  $k = 1$ . Note that for  $t \geq \ell_1$ , we have

$$\Pr_{x \sim \mathcal{D}} [x \in \mathcal{S}_1(\mathcal{F}_t)] \leq \alpha_1.$$









757 at most  $2\alpha$  examples  $\tilde{x}_s$ ,  $s \leq n$ , with  $< \alpha$  other examples  $\tilde{x}_{s',i}$  in  $[\tilde{x}_{s,i}, a_i^*) \cup (b_i^*, \tilde{x}_{s,i}]$  (namely, the  
758  $\leq \alpha$  examples with smallest  $\tilde{x}_{s,i}$  such that  $\tilde{x}_{s,i} > b_i^*$ , and the  $\leq \alpha$  examples with largest  $\tilde{x}_{s,i}$  such  
759 that  $\tilde{x}_{s,i} < a_i^*$ ). So there are at most  $2\alpha p$  negative examples  $\tilde{x}_s$  which would be attackable if they  
760 were swapped with  $\tilde{x}_n$ .

761 Altogether there are at most  $2p(\alpha + 1)$  examples  $\tilde{x}_s$  which would be attackable if they were swapped  
762 with  $\tilde{x}_n$ . Thus, the probability i.i.d. example  $\hat{x}_t$  is attackable is at most  $2p(\alpha + 1)/n$  where  $n$  is  
763 the number of i.i.d. points seen so far including  $\hat{x}_t$ . Summing, the expected number of abstentions  
764 on i.i.d. examples is at most  $2p(\alpha + 1) \log T$ . Now setting  $\alpha = \sqrt{T/\log T}$ , gives us the desired  
765 result.  $\square$
